# Supplementary material
Source: PubMed Central journal article supplement (PMC3761373)
Supplement: NIHMS89524-supplement-Supplementary_Data.pdf [file NIHMS89524-supplement-Supplementary_Data.pdf]

## SUPPLEMENTAL DATA

**Supplemental Figure 1. Characterization of stable LOX cell lines.** (A-B) Cells were grown with doxycycline (2mg/ml) to suppress mutant ARF6 expression or without doxycycline for 24 hrs, to induced expression of ARF6 mutants. In A, equal amounts of cell lysates were subjected to SDS-PAGE followed by Western blotting for GFP, ARF6, HA to detect mutant ARF6 expression, or  $\alpha$ -tubulin, as a loading control. Transgene expression in the presence and absence of doxycycline is shown in B. (C) Equal amounts of lysates were subjected to the MT2 pull-down assay and representative blots shows the levels of ARF6-GTP in each cell line. Total ARF6 and  $\alpha$ -tubulin in cell lysates were examined by Western blotting. (D) LOX<sup>ARF6-GTP</sup> and LOX<sup>ARF6-GDP</sup> cells expressing HA-tagged ARF6 mutants were fixed and stained with mouse HA antibody. Representative confocal images of LOX<sup>GFP</sup>, LOX<sup>ARF6-GTP</sup> and LOX<sup>ARF6-GDP</sup> cells are shown.

**Supplementary Figure 2. Proliferation of LOX cell lines.**  $1 \times 10^5$  LOX<sup>GFP</sup>, LOX<sup>ARF6-GDP</sup> and LOX<sup>ARF6-GTP</sup> cells were seeded in individual wells of 6-well tissue culture plates. Cells were trypsinized each day and counted on a hemacytometer. The graph shows the average proliferation rates of the cell lines from two independent experiments, each performed in duplicate.

**Supplemental Figure 3. Morphological analysis of LOX<sup>GFP</sup> primary tumors.** Primary tumors and the surrounding tissues were fixed at 2, 3, and 4 weeks post implantation, sectioned at 4  $\mu$ m and dried onto glass slides. The sections were then processed for (A) immunofluorescence microscopy (Red= nuclear stain, ToPro-3; green=GFP) or (B) histological analysis (black=nuclei, red=muscle, blue=collagen). The images are representative cross

sections of tumors excised from mice at the skin and tumor interface. Note the progressive compromise to fat and muscle (arrows) layers by week 4.

**Supplemental Figure 4. Subcultured cells from tumor explants.** (A) LOX<sup>GFP</sup> tumor cells were isolated and cultured in G418 as described. Image shows subcultured cells expressing GFP and co-stained with rhodamine phalloidin (right) isolated from corresponding tissue with LOX<sup>GFP</sup> cells co-stained with ToPro-3 (left). (B) Representative phase contrast images of cells subcultured from LOX<sup>GFP</sup> (upper panel) and LOX<sup>ARF6-GDP</sup> macrometastases from tissues as indicated.

**Supplemental Figure 5. PLD is required for tumor cell invasion.** (A). LOX<sup>ARF6-GDP</sup> cells and sub-cultured LOX<sup>ARF6-GDP</sup> cells from metastatic tumors seeded on gelatin-coated coverslips were treated with 4-butanol or 1-butanol as indicated. Cells were scraped, lysed, probed for ERK and phospho-ERK by Western blotting. (B and C) Sub-cultured LOX<sup>ARF6-GDP</sup> cells were seeded on FITC-gelatin coated coverslips in serum free (SF) media at which point cells are quiescent. SF media was replaced with complete media alone or with 0.3% 1-butanol or 4-butanol. Cells were fixed and stained for actin using rhodamine-phalloidin (red). Sub-cultured LOX<sup>ARF6-GDP</sup> cells exhibiting matrix degradation underneath were scored and the percentage is shown (C).

Supplementary Figure 1

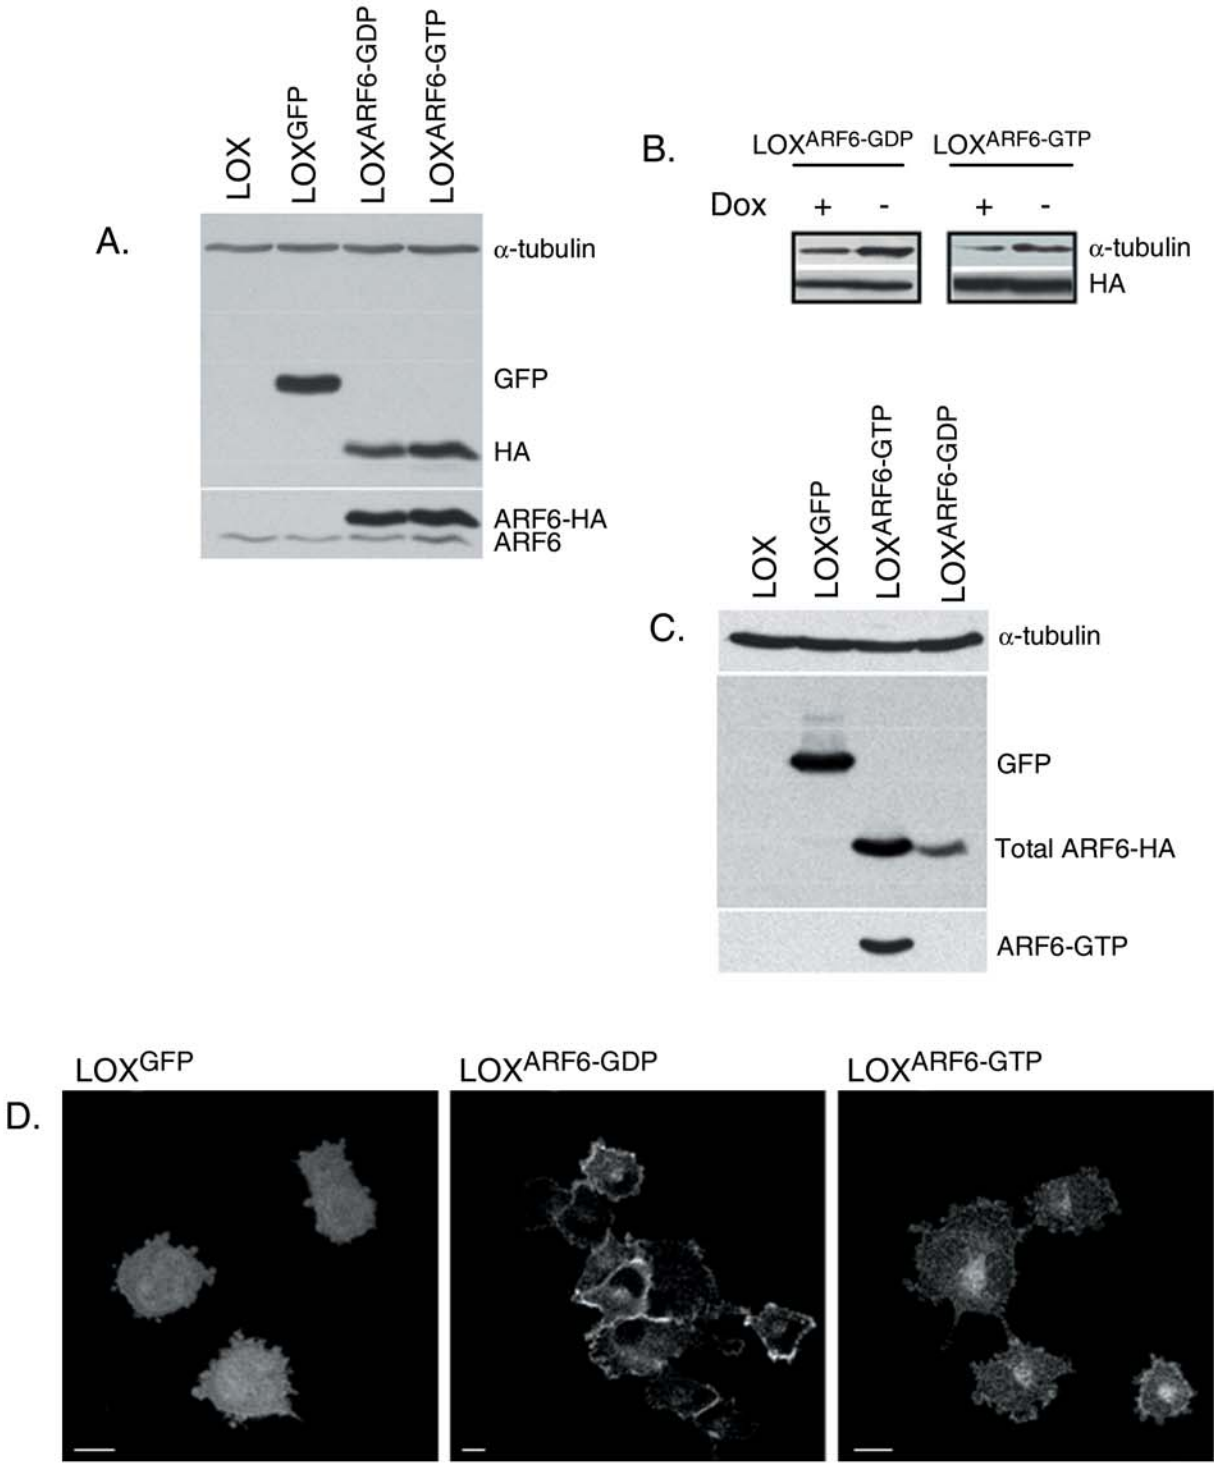

## Supplementary Figure 2

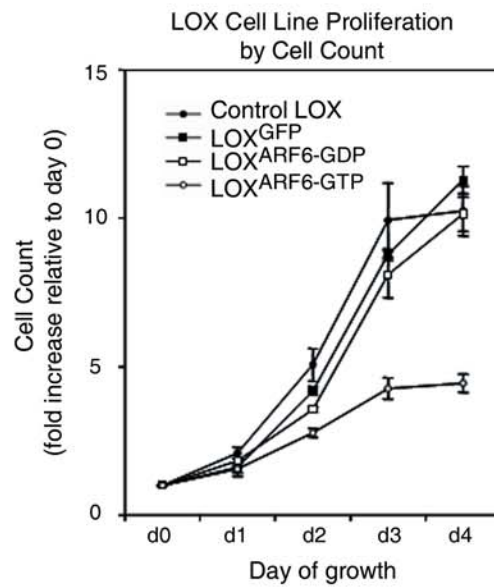

Supplementary Figure 3

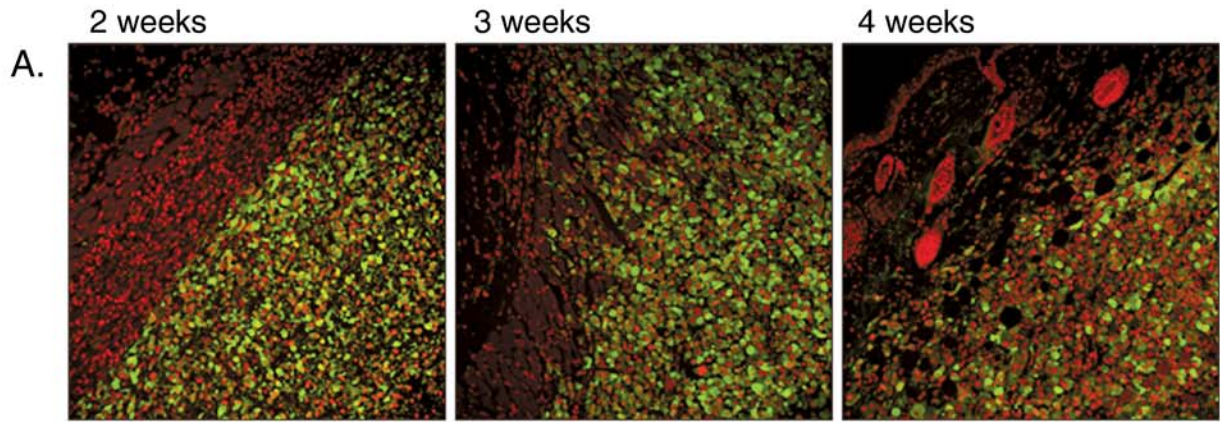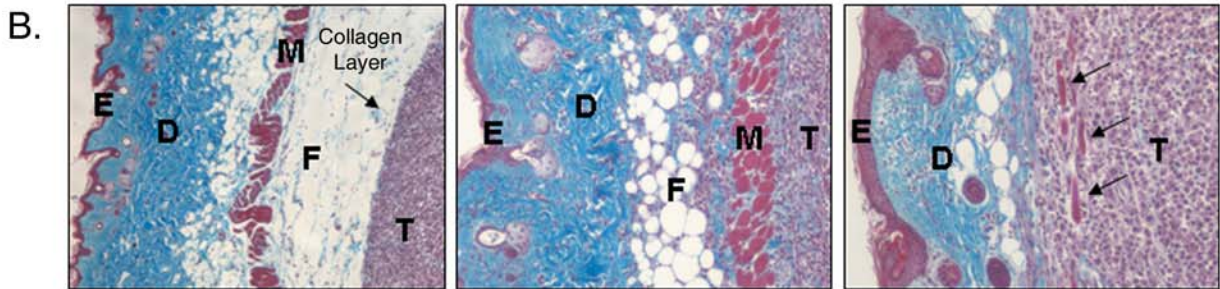

Supplementary Figure 4

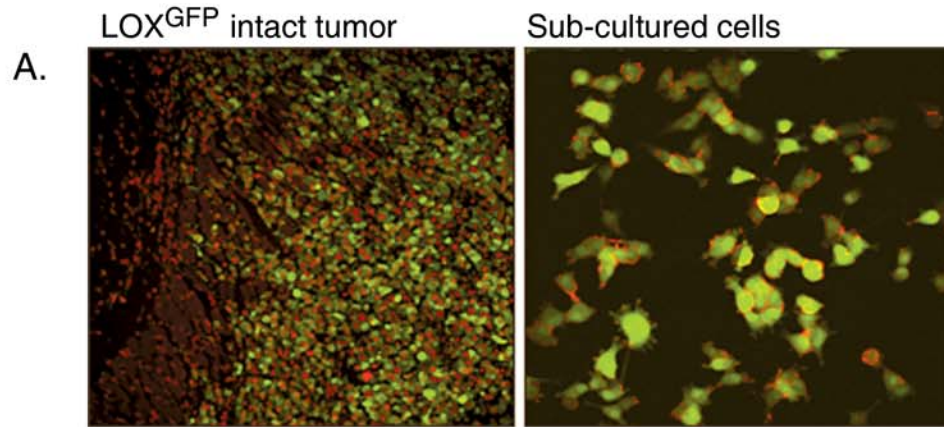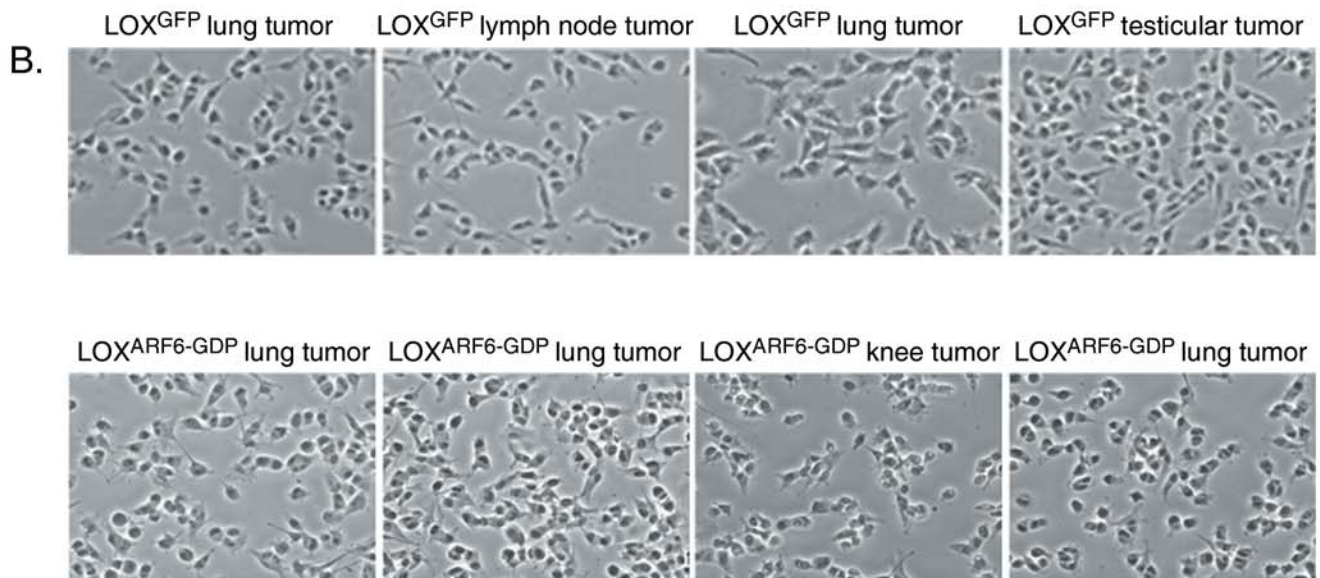

Supplementary Figure 5

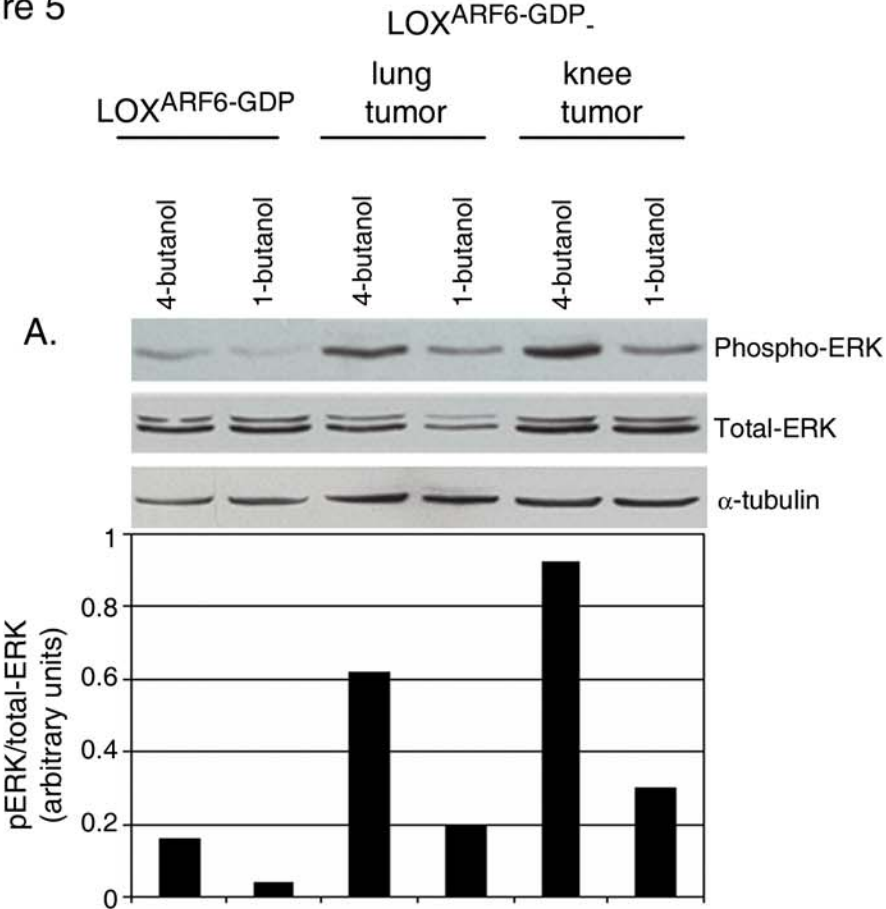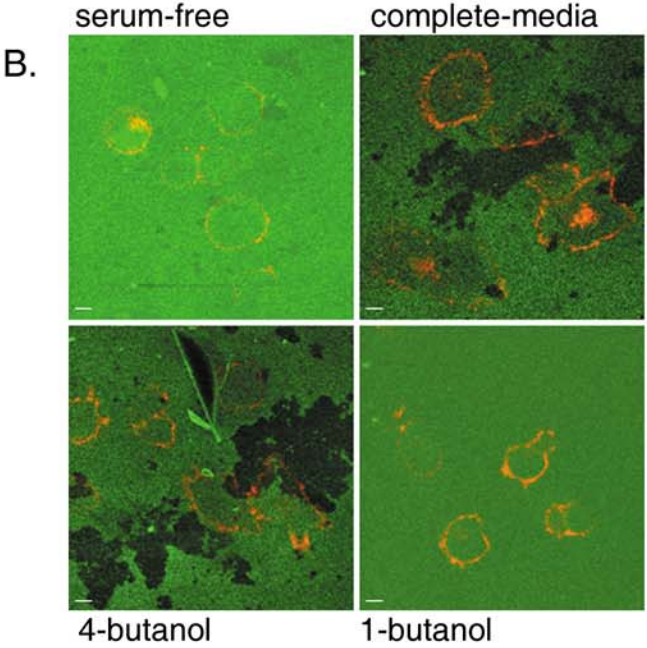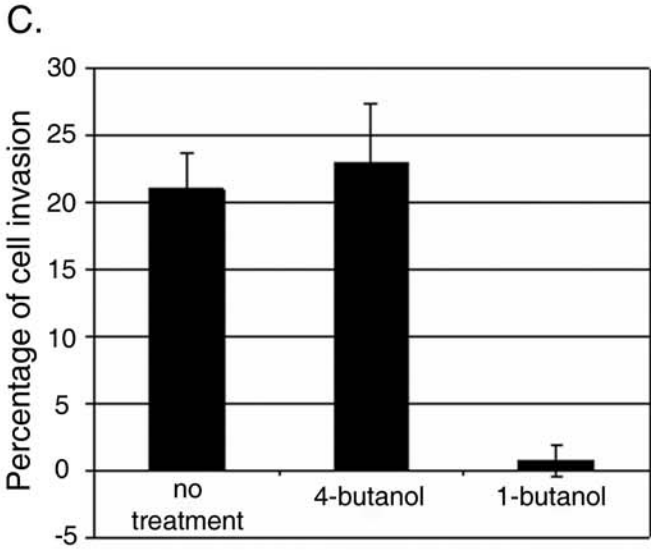

Table I. Percentage of LOX cells in each stage of the cell cycle

LOX<sup>GFP</sup>, LOX<sup>ARF6-GDP</sup>, LOX<sup>ARF6-GTP</sup> cells isolated from the primary tumors were analyzed by flow cytometry using Cytomics FC-500 flow cytometer. The percentage of cells undergoing apoptosis and in each phase of the cell cycle was determined according to an internal protocol. Representative data is shown.

| Cell line                             | Cells in stages of the cell cycle (%) |       |      |      |
|---------------------------------------|---------------------------------------|-------|------|------|
|                                       | Apoptosis                             | Go/G1 | S    | G2/M |
| LOX <sup>GFP</sup><br>Prim. Tum.      | 4.3                                   | 60.6  | 18   | 17.2 |
| LOX <sup>ARF6-GDP</sup><br>Prim. Tum. | 2.7                                   | 59.4  | 13.3 | 25.6 |
| LOX <sup>ARF6-GTP</sup><br>Prim. Tum. | 3.7                                   | 65.6  | 3.3  | 28.3 |



## SUPPLEMENTAL METHODS

**Generation of LOX<sup>GFP</sup>, LOX<sup>ARF6-GDP</sup>, or LOX<sup>ARF6-GTP</sup> cell lines.** Stable GFP-LOX cells were generated by transfection with pEGFP (Clontech) and selection with 800 µg/ml G418. Stable ARF6(T27N)-HA and ARF6(Q67L)-HA LOX cell lines were generated by sequential transfection with Metafectene Reagent (Biontex) first with the pTet-Off (Clontech) followed by selection of individual clones with G418 (800 µg/ml) and second, with pTRE2-ARF6 mutant plasmids and selected with hygromycin (500 µg/ml). One representative ARF6(T27N)-HA and ARF6(Q67L)-HA clonal population was characterized and used in the experiments. Stable cell lines expressing the ARF6 mutants were cultured under the same conditions as GFP-LOX except that tetracyclin-free FBS was used. After weeks of selection, cells were maintained in 200µg/ml hygromycin and/or 200 µg/ml G418. Integration of the plasmids was confirmed by sequencing the transgene from genomic DNA.

**Generation of pTRE2-ARF6(Q67L)-HA and pTRE2-ARF6(T27N)-HA plasmids.** pTRE2-ARF6(Q67L)-HA was generated from by PCR amplification from pcDNA3.1(-) ARF6(Q67L)-HA (9) with Sal I ends and inserted into the pTRE2 hygro vector (Clontech) at the Sal I site. The following primers were used for PCR amplification: [Fw: ACGCGTCGACATGGGGAAGGTGC], [Rev: ACGCGTCGACTTAGAGGCTAGCG]. ARF6(T27N)-HA was cut with Xba I from pcDNA3.1(-) and inserted into the pTRE hygro at the Nhe I site to create the pTRE2-ARF6(T27N)-HA plasmid.
